# Supplementary material for: Polydopamine-derived porous nanofibers as host of ZnFe2O4 nanoneedles: towards high-performance anodes for lithium-ion batteries
Source: Royal Society of Chemistry journal article supplement (doi:10.1039/c4ra16460a), 2015-01-01
Supplement: c4ra16460a1.pdf [file c4ra16460a1.pdf]

# Polydopamine-derived Porous Nanofibers as Host of $\text{ZnFe}_2\text{O}_4$ Nanoneedles: Towards High-performance Anodes for Lithium- Ion Batteries

Junhua Kong,<sup>a</sup> Xiayin Yao,<sup>a</sup> Yuefan Wei,<sup>b</sup> Chenyang Zhao,<sup>a</sup> Jia Ming Ang,<sup>a</sup> Xuehong Lu<sup>a,\*</sup>

<sup>a</sup> School of Materials Science and Engineering, Nanyang Technological University, 50 Nanyang Avenue, Singapore 639798

<sup>b</sup> School of Mechanical and Aerospace Engineering, Nanyang Technological University, 50 Nanyang Avenue, Singapore 639798

\* E-mail: [asxhlu@ntu.edu.sg](mailto:asxhlu@ntu.edu.sg)

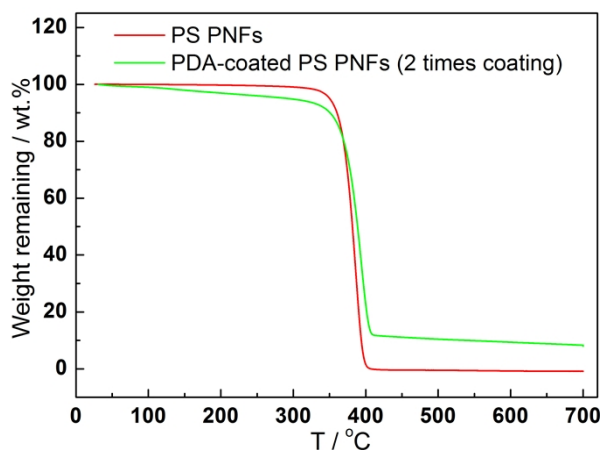

**Fig. S1.** TGA curves of pure PS porous nanofibers (PNFs) and PDA-coated PS PNFs from 2-time coating. The TGA test conditions are the same as that for annealing of PDA-coated PS PNFs: heating from room temperature in  $\text{N}_2$  environment at heating rate of 5  $^{\circ}\text{C}/\text{min}$  to 700  $^{\circ}\text{C}$  and keeping at 700  $^{\circ}\text{C}$  for 60 min. It is indicated that the PS PNFs fully decompose while there is about 8.4 wt% residue from PDA-coated PS PNFs, which is due to the conversion of PDA to carbon that doped with N and O.

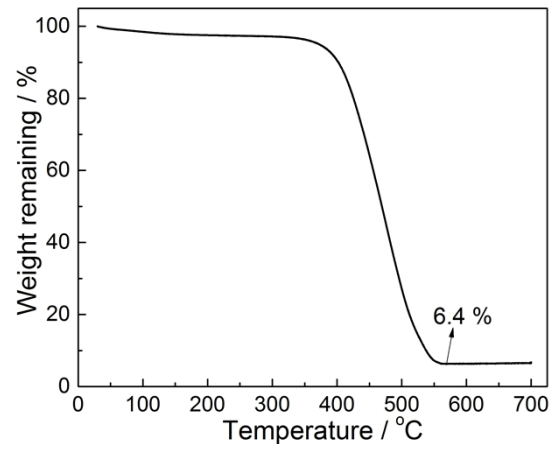

**Fig. S2.** TGA curve of the introduction of  $\text{ZnFe}_2\text{O}_4$  nanoneedles into PNFs-2 (ZnFe-PNFs-2), showing the low  $\text{ZnFe}_2\text{O}_4$  content of 6.4 wt%.

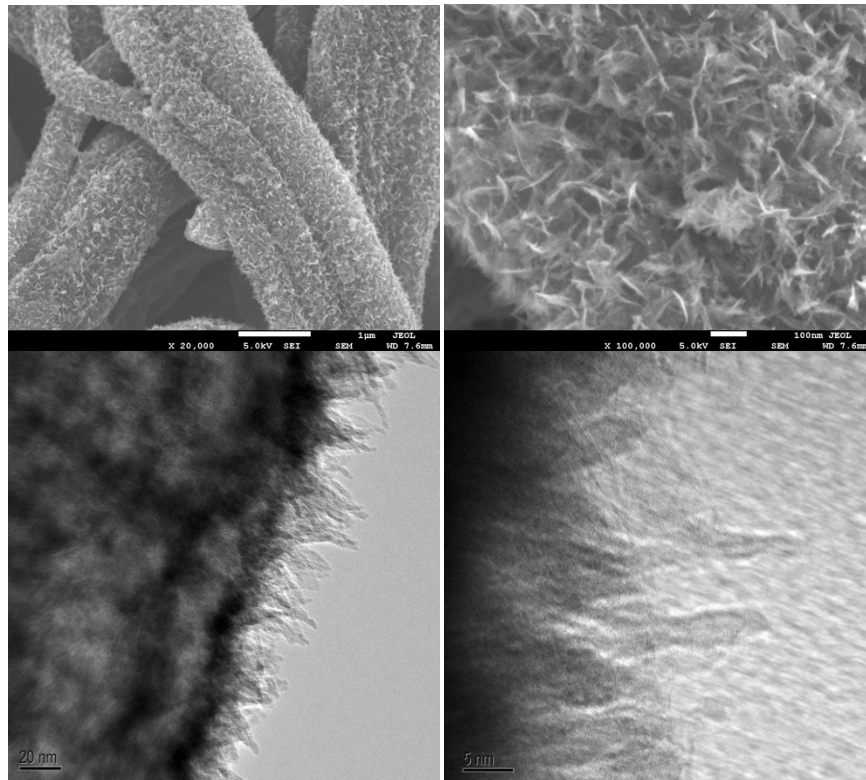

**Fig. S3.** The morphology of the Zn complexes/ $\text{Fe}(\text{OH})_3$  nanoneedles on the C-PDA porous nanofibers before annealing.

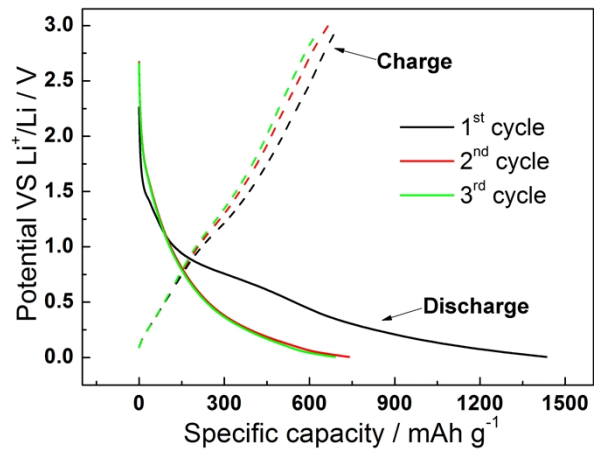

**Fig. S4.** Galvanostatic discharge/charge profiles (1<sup>st</sup>, 2<sup>nd</sup> and 3<sup>rd</sup> cycle) of the C-PDA porous nanofibers (PNFs-6) as a LIB anode, indicating the metallic lithium plating mechanism for the lithiation/de-lithiation.
